# Supplementary material
Source: MDPI journal article supplement (https://www.mdpi.com/1999-4907/12/9/1155)
Supplement: s1 [file s1]

Archive with 3 entries (3 files):
- Bisection_method.pdf
- Growth_equations.pdf
- Redwood_growth_model.xlsm
