# Supplementary material
Source: MDPI journal article supplement (https://www.mdpi.com/1999-4907/12/9/1155)
Supplement: s1 [file s1 › Bisection_method.pdf]

## Use of bisection method in the redwood growth model

The bisection method is used in the redwood growth model for calculating  $\Delta t_{thin}$  following a thinning, and for estimating  $D_{30}$  from a plot measurement. This simple root-finding algorithm can be used for solving  $f(x) = 0$  for a continuous function  $f$  with solution known to lie in the interval  $[a, b]$ . If the required precision of  $x$  is  $\pm P$ , the number of iterations required to guarantee this precision is  $N = \log_2(|b-a|/P)$ . The algorithm is as follows:

Repeat the following three steps  $N$  times:

1. Calculate  $c = (a+b)/2$ ,
2. Calculate  $f(a)$ ,  $f(b)$ , and  $f(c)$ ,
3. If  $f(a) \times f(c) < 0$  then  $b = c$ , else  $a = c$

After  $N$  iterations, the final solution is  $x = c$ .

### Calculation of $\Delta t_{thin}$

The bisection method is used to calculate  $t'$ , the value of  $t_{BH}$  for which Equation (18) predicts  $D_q$  to equal  $D_2$ , the  $DBH$  immediately following thinning. The method is applied by setting  $a = 0.1$  and  $b = t_{BH} + 1$  with  $f(t_{BH}) = D_2 - D_q$ , where  $D_q$  is calculated using Equation (18). Once  $t'$  is estimated using this procedure,  $\Delta t_{thin}$  is calculated using  $\Delta t_{thin} = t' - t_{thin}$ . Eleven iterations guarantee a precision for the solution of  $\Delta t_{thin}$  of better than  $\pm 0.05$  years.

### Calculation of $D_{30}$

The bisection method is used to calculate  $D_{30}$  from a plot measurement  $D_0$  of  $D_q$ . Measurement age, stand density and  $SI$  for the plot must also be known along with any known thinning history. The method is applied by setting  $a = 1$  and  $b = 100$ , with  $f(t_{BH}) = D_0 - D_q$ , where  $D_q$  is calculated using Equation (18).

If the plot has been thinned prior to measurement,  $D_{30}$  is firstly estimated using the bisection method with  $\Delta t_{thin}$  set to 0. Equation (18) is then used to predict the  $D_q$  immediately before thinning,  $D_1$ , and Equation (6) used to estimate  $D_q$  following thinning,  $D_2$ . The value of  $\Delta t_{thin}$  can then be estimated using the bisection method as outlined above. The bisection method is then used to estimate  $D_{30}$  using  $\Delta t_{thin}$ . This procedure is repeated several times until a stable estimate of  $D_{30}$  is obtained.
