# Supplementary material
Source: MDPI journal article supplement (https://www.mdpi.com/1999-4907/12/9/1155)
Supplement: s1 [file s1 › Growth_equations.pdf]

## Derivation of growth equations

The different forms of the Richards, Weibull and Korf models listed in Table 2 of the paper were derived using the GADA technique described by Cieszewski & Bailey (2000). Below are details of these derivations.

### Richards model

Base form:

$$(S1) \quad y = a(1 - e^{-bt})^c$$

Anamorphic form:

The GADA technique uses a theoretical variable labelled the growth intensity factor,  $x$ , which quantifies how the growth curve varies in shape or level across different sites. For an anamorphic model, the asymptote parameter,  $a$ , is replaced by  $x$ , i.e.,

$$(S2) \quad y = x(1 - e^{-bt})^c$$

This equation is solved for  $x$  at point  $(t_0, y_0)$  giving,

$$x = y_0 / (1 - e^{-bt_0})^c$$

Substituting this into Equation (S2) produces the required anamorphic equation,

$$(S3) \quad y = y_0 \left( \frac{1 - e^{-bt}}{1 - e^{-bt_0}} \right)^c$$

Inverting this equation produces the following *SI* equation where  $t_0$  is the base age,

$$y_0 = y \left( \frac{1 - e^{-bt}}{1 - e^{-bt_0}} \right)^{-c}$$

Common-asymptote form:

For the common-asymptote model, the time-scale parameter,  $b$ , in the base model is replaced by  $x$ ,

$$(S4) \quad y = a(1 - e^{-xt})^c$$

Solving for  $x$  at point  $(t_0, y_0)$ ,

$$x = -\ln(1 - (y_0/a)^{-c}) / t_0$$

Substituting this into Equation (S4) produces the required common-asymptote equation,

$$(S5) \quad y = a \left( 1 - \left( 1 - \left( \frac{y_0}{a} \right)^{1/c} \right)^{t/t_0} \right)^c$$

Inverting this equation produces the following *SI* equation,

$$y_0 = a \left( 1 - \left( 1 - (y/a)^{-c} \right)^{-t/t_0} \right)^c$$

### Weibull model

Base form:

$$(S6) \quad y = a(1 - e^{-bt^c})$$

Anamorphic form:

To derive the anamorphic form, replace the parameter,  $a$ , with  $x$ ,

$$(S7) \quad y = x(1 - e^{-bt^c})$$

Solve for  $x$  at point  $(t_0, y_0)$ ,

$$x = y_0 / (1 - e^{-bt_0^c})$$

Substituting this into Equation (S7) produces the required anamorphic equation,

$$(S8) \quad y = y_0 \frac{1 - e^{-bt^c}}{1 - e^{-bt_0^c}}$$

Inverting this equation produces the following *SI* equation,

$$y_0 = y \frac{1 - e^{-bt_0^c}}{1 - e^{-bt^c}}$$

Common-asymptote form:

To derive the common-asymptote form, replace the parameter,  $b$ , with  $x$ ,

$$(S9) \quad y = a(1 - e^{-xt^c})$$

Solve for  $x$  at point  $(t_0, y_0)$ ,

$$x = -\ln(1 - (y_0/a)) / t_0^c$$

Substituting this into Equation (S9) produces the required common-asymptote equation,

$$(S10) \quad y = a \left( 1 - \left( 1 - \frac{y_0}{a} \right)^{(t/t_0)^c} \right)$$

Inverting this equation produces the following *SI* equation,

$$y_0 = a \left( 1 - \left( 1 - \frac{y}{a} \right)^{-(t/t_0)^c} \right)$$

### Korf model

Base form:

$$(S11) \quad y = ae^{-bt^{-c}}$$

Anamorphic form:

To derive the anamorphic form, replace the parameter,  $a$ , with  $x$ ,

$$(S12) \quad y = xe^{-bt^{-c}}$$

Solve for  $x$  at point  $(t_0, y_0)$ ,

$$x = y_0 / e^{-bt_0^{-c}}$$

Substituting this into Equation (S12) produces the required anamorphic equation,

$$(S13) \quad y = y_0 \frac{e^{-bt^{-c}}}{e^{-bt_0^{-c}}}$$

Inverting this equation produces the following *SI* equation,

$$y_0 = y \frac{e^{-bt_0^{-c}}}{e^{-bt^{-c}}}$$

Common-asymptote form:

To derive the common-asymptote form, replace the parameter,  $b$ , with  $x$ ,

$$(S14) \quad y = xe^{-xt^{-c}}$$

Solve for  $x$  at point  $(t_0, y_0)$ ,

$$x = -\ln(y_0/a)/t_0^{-c}$$

Substituting this into Equation (S14) produces the required common-asymptote equation,

$$(S15) \quad y = a \left( \frac{y_0}{a} \right)^{(t/t_0)^{-c}}$$

Inverting this equation produces the following *SI* equation,

$$y_0 = \left( \frac{y}{a} \right)^{-(t/t_0)^{-c}}$$

Polymorphic form:

To derive the polymorphic form, we start by assuming that  $x$  is proportional to the exponential of the asymptote,  $a$ , and inversely related to the time scale parameter,  $b$ ,

$$(S16) \quad y = e^x e^{-(b/x)t^{-c}}$$

Taking logs and multiplying both sides of the equation by  $x$  produces the following quadratic equation,

$$x^2 - x \ln y - bt^{-c} = 0$$

Solving for  $x$  at point  $(t_0, y_0)$  produces,

$$x = \frac{\ln y_0 + \sqrt{(\ln y_0)^2 + 4bt_0^{-c}}}{2}$$

Substituting this into Equation (S16) produces the required polymorphic equation,

$$(S17) \quad y = e^{R_0/2 - 2b/(R_0 t^c)}, \text{ where, } R_0 = \ln y_0 + \sqrt{(\ln y_0)^2 + 4b/t_0^c}$$

To produce a *SI* equation for this model, first take logs of (S17) and multiply by  $R_0$  to produce the quadratic equation,

$$R_0^2/2 - R_0 \ln y - 2b/t^c = 0$$

Solving for  $R_0$  produces,

$$R_0 = \ln y + \sqrt{(\ln y)^2 + 4b/t^c}$$

Which leads to,

$$\sqrt{(\ln y_0)^2 + 4b/t_0^c} = R - \ln y_0, \text{ where, } R = \ln y + \sqrt{(\ln y)^2 + 4b/t^c}$$

Squaring both sides produces,

$$(\ln y_0)^2 + 4b/t_0^c = R^2 - 2R \ln y_0 + (\ln y_0)^2$$

Which simplifies to the required *SI* equation,

$$y_0 = e^{(4b/t_0^c - R^2)/(-2R)}$$
