# Supplementary material
Source: MDPI journal article supplement (https://www.mdpi.com/1999-4907/12/9/1155)
Supplement: s1 [file s1 › Redwood_growth_model.xlsm]

## Sheet: Redwood growth model
	Redwood Growth Model						Reference: Kimberley, M.O. and Watt, M.S. 2021. A novel approach to modelling stand-level growth of an even-aged forest using a volume productivity index with application to New Zealand-grown coast redwood, Forests.
	Developed by Scion, Rotorua, New Zealand
	Stand information	300-index	23.474				Growth model predictions
		Site index (m)	25.5054				Age (years)	Stand density (stem/ha)	BA (m2/ha)	DBH (cm)	Stem Volume (m3/ha)	MTH (m)	Mean height (m)
		Stand density at planting (stems/ha)	830
		Rotation age (years)	40
		Attritional mortality					0	830	0	0	0	0.3	0.25916
							1	828.614	0.0226964	0.590551	0	0.336356	0.290571
							2	827.23	0.719603	3.32804	0	0.64923	0.560865
							3	825.849	2.94602	6.73943	0	1.27232	1.09916
	Thinnings		Thin 1	Thin 2	Thin 3		4	824.469	6.7882	10.2387	7.41261	2.10491	1.81847
		Age at thinning (years)	25				5	823.092	11.9785	13.6123	16.3197	3.06435	2.64739
		Stand density after thinning (stems/ha)	500				6	821.716	18.1727	16.7805	30.3477	4.09594	3.53866
		Thinning coefficient					7	820.338	25.0462	19.7165	49.6694	5.16463	4.46202
							8	818.954	32.3221	22.4169	74.0998	6.24794	5.39804
	1		0		1		9	817.557	39.7765	24.8891	103.195	7.33137	6.33419
							10	816.139	47.2367	27.1464	136.367	8.40553	7.26237
							11	814.691	54.5758	29.2051	172.973	9.46438	8.17735
							12	813.201	61.7061	31.0828	212.381	10.5041	9.07583
							13	811.66	68.5727	32.7977	254.009	11.5223	9.95578
	Measurement metrics used to estimate site productivity	Age (years)	20				14	810.059	75.146	34.3677	297.354	12.5177	10.816
		Stand density (stems/ha)	780				15	808.387	81.4154	35.8095	341.989	13.4896	11.6561
		Height (m)	18	1			16	806.638	87.3838	37.1391	387.57	14.4379	12.4757
		DBH (cm) or BA (m2/ha)	40	1			17	804.804	93.0629	38.3706	433.823	15.3626	13.2751
							18	802.879	98.4695	39.5167	480.535	16.2642	14.0545
							19	800.859	103.623	40.5888	527.541	17.1431	14.8144
							20	798.738	108.544	41.5964	574.718	18	15.5553
							21	796.515	113.252	42.5482	621.969	18.8355	16.2777
							22	794.185	117.766	43.4516	669.226	19.6502	16.9824
							23	791.746	122.104	44.3127	716.436	20.445	17.6698
							24	789.197	126.282	45.1371	763.558	21.2205	18.3406
							25	500	91.5227	48.2764	569.28	21.9773	19.2043
							26	498.919	94.8138	49.1899	605.728	22.7162	19.8518
							27	497.814	99.157	50.3597	649.703	23.4378	20.4843
							28	496.676	103.41	51.4874	694.018	24.1428	21.1024
							29	495.502	107.578	52.5768	738.621	24.8318	21.7067
							30	494.289	111.663	53.6313	783.464	25.5054	22.2978
							31	493.038	115.668	54.654	828.505	26.164	22.8761
							32	491.745	119.597	55.6474	873.704	26.8084	23.4421
							33	490.41	123.452	56.614	919.025	27.439	23.9962
							34	489.032	127.236	57.5561	964.436	28.0563	24.539
							35	487.607	130.951	58.4756	1009.91	28.6608	25.0708
							36	486.137	134.6	59.3743	1055.41	29.2529	25.592
							37	484.619	138.184	60.2538	1100.92	29.833	26.1031
							38	483.052	141.706	61.1157	1146.42	30.4016	26.6044
							39	481.436	145.168	61.9613	1191.87	30.9591	27.0962
							40	479.77	148.57	62.792	1237.27	31.5059	27.579
